# Supplementary material
Source: Copernicus journal article supplement (doi:10.5194/egusphere-2026-416)
Supplement: Supplementary file 1 [file egusphere-2026-416-supplement.pdf]

# **A Dual-phase Ensemble Framework for Enhancing Reservoir Inflow Forecasting**

## **Supplementary Information**

Mihretab G. Tedla, Sandhya Dhakal, Hua Zhang

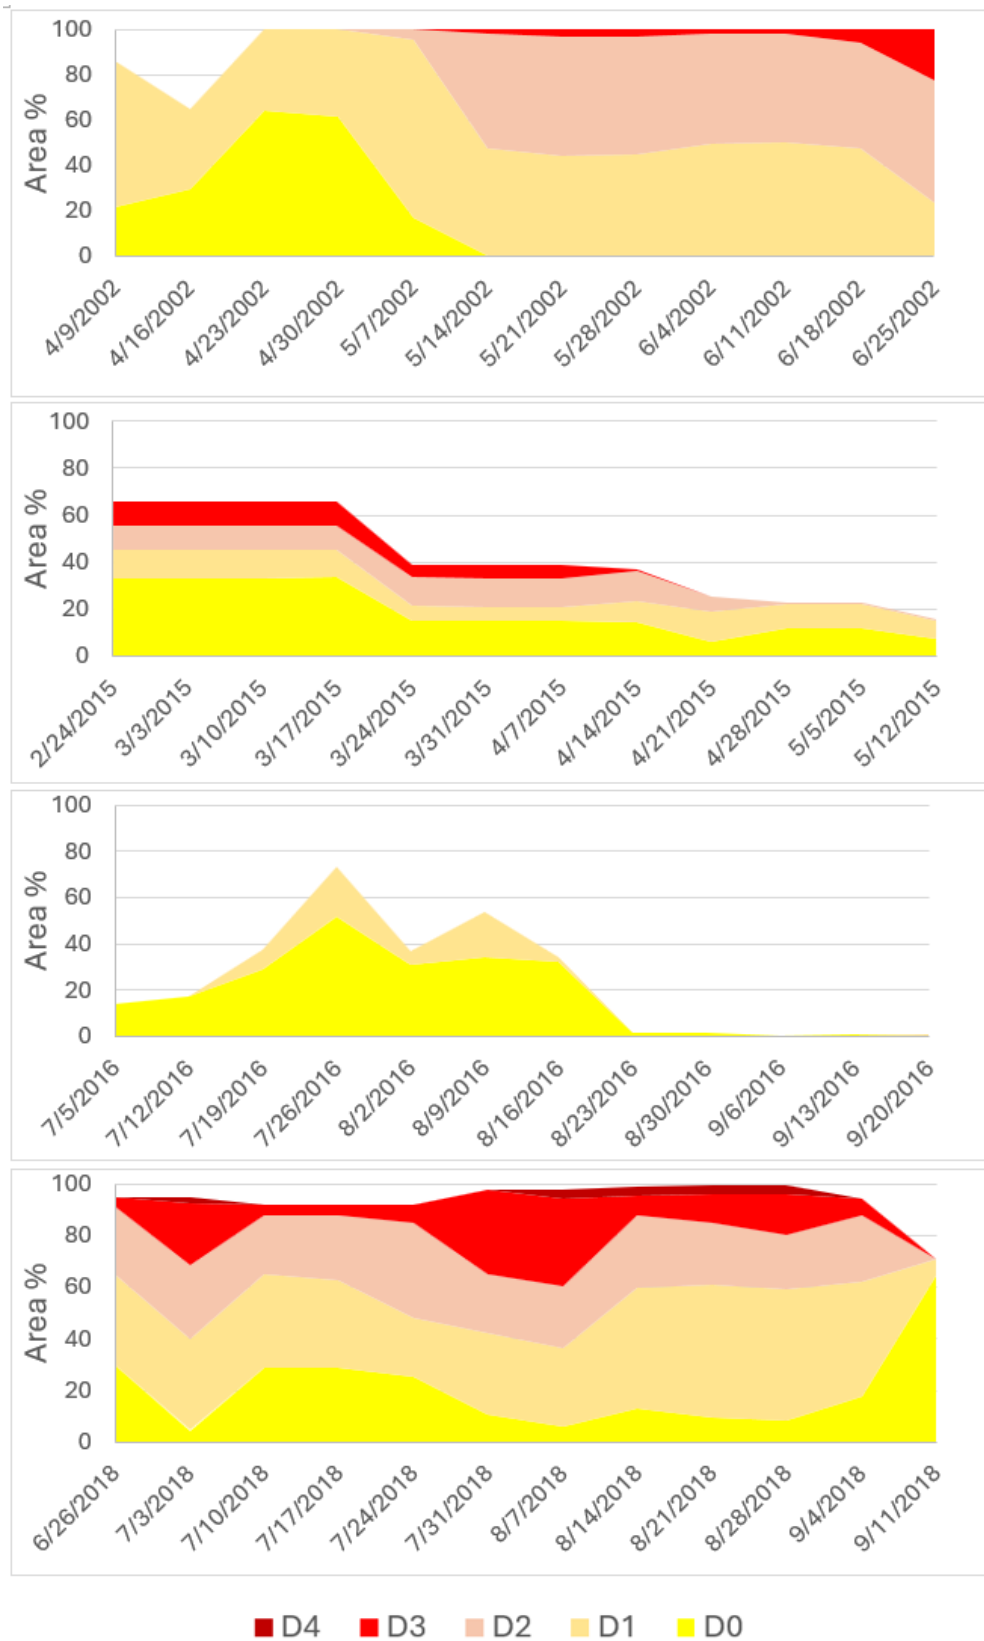

Figure S1: Selected rainfall events 12 weeks drought category pattern

## 1997 Calibration

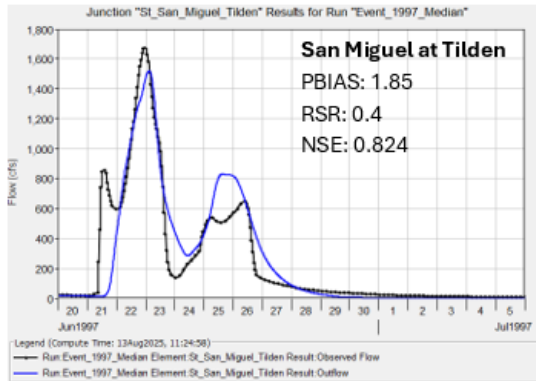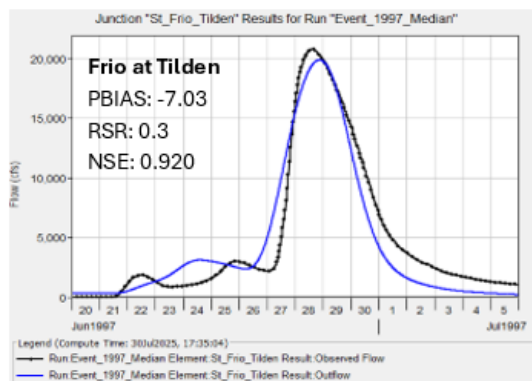

## 2002 Calibration

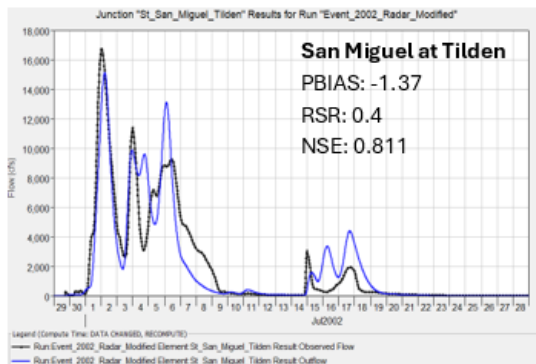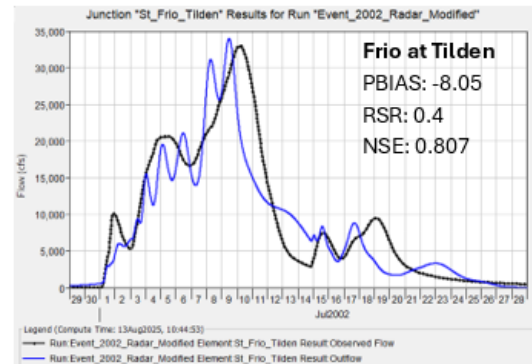

## 2015 Calibration

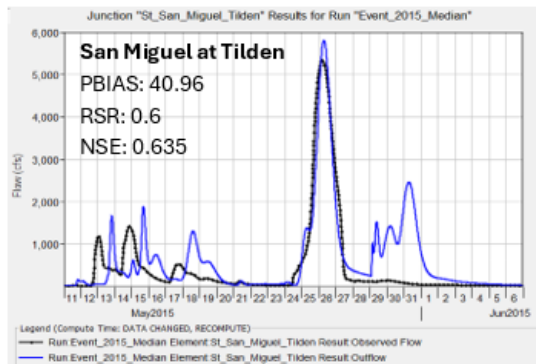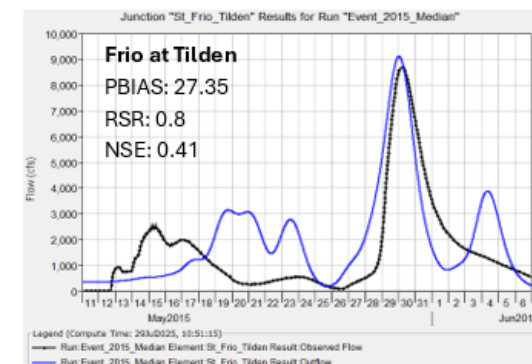

## 2018 Calibration

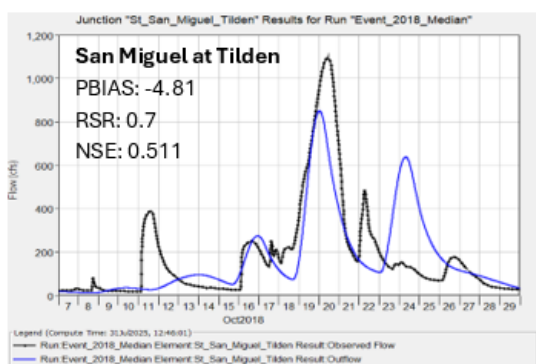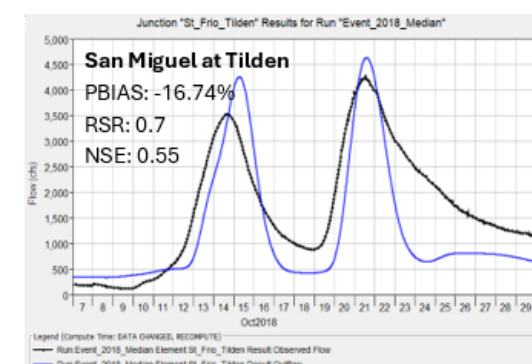

Figure S2: Flow hydrograph for calibration at Choke Canyon Reservoir inflow stations

## 2002 Calibration

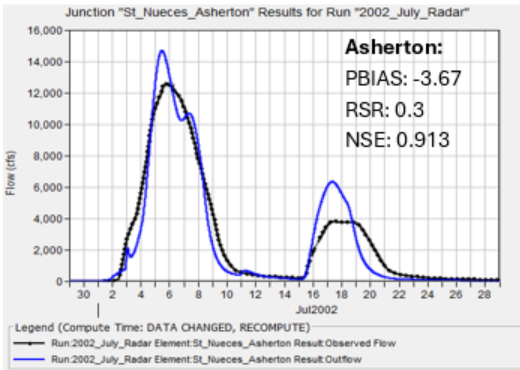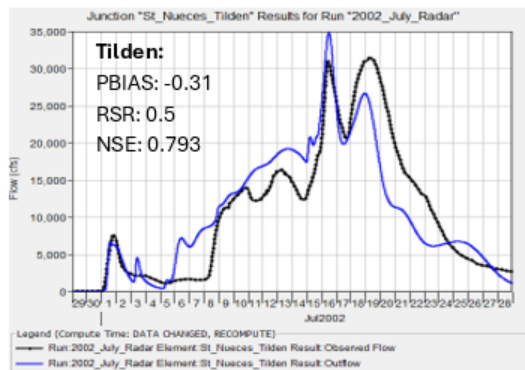

## 2002 Calibration

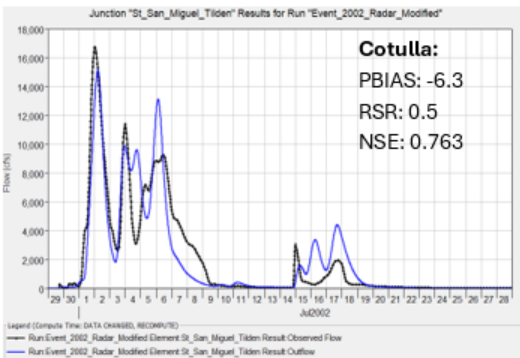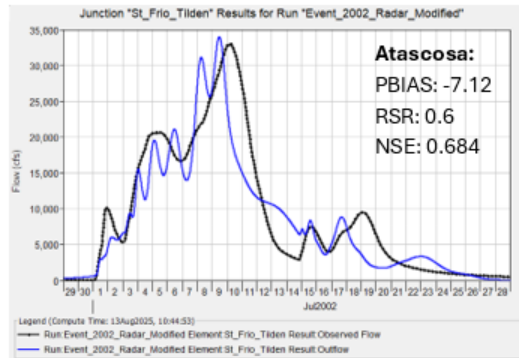

## 2015 Calibration

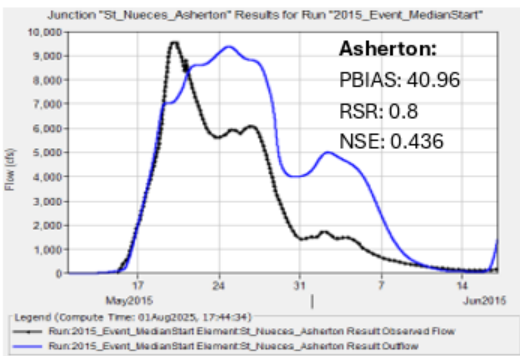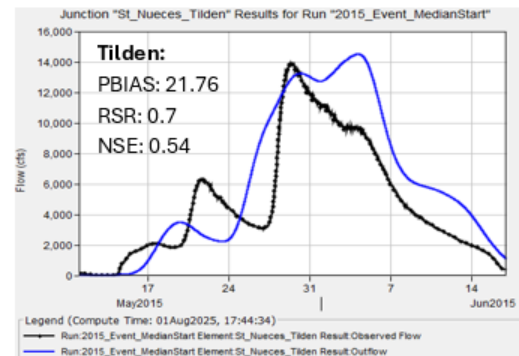

## 2015 Calibration

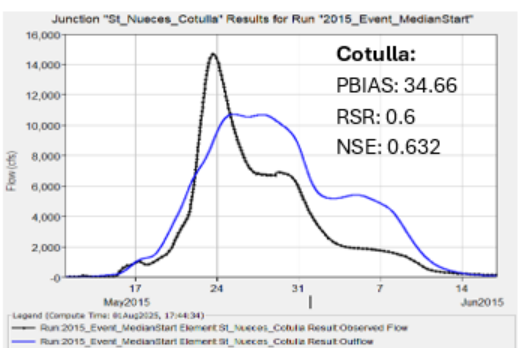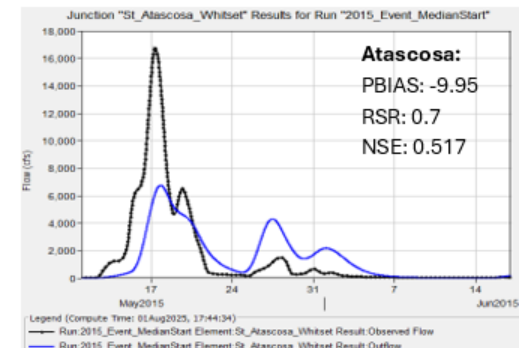

Figure S3a: Flow hydrograph for calibration at Lake Corpus Christi stations (2002 & 2015)

## 2016 Calibration

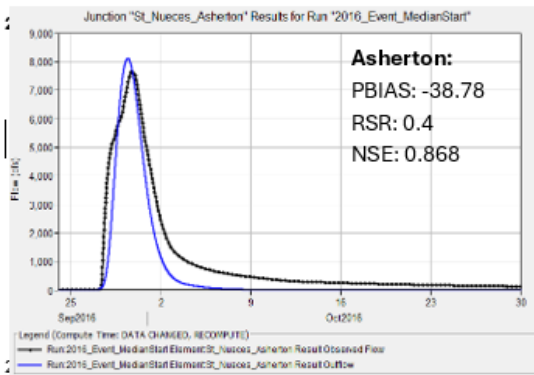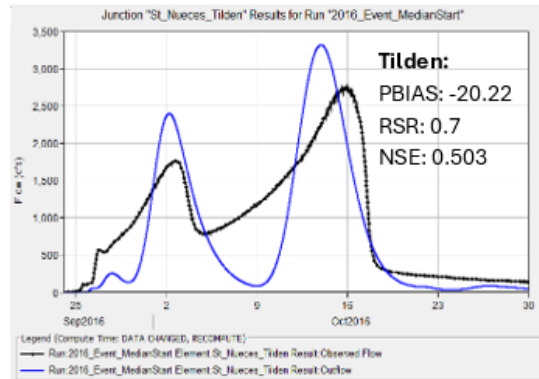

## 2016 Calibration

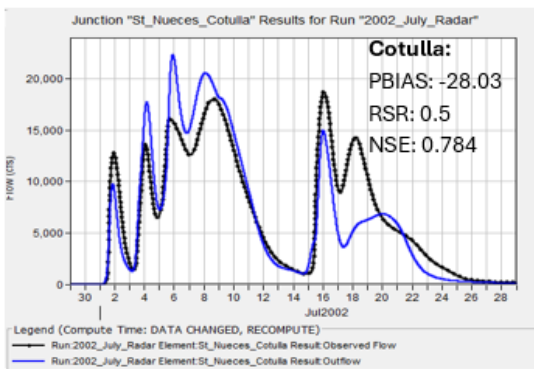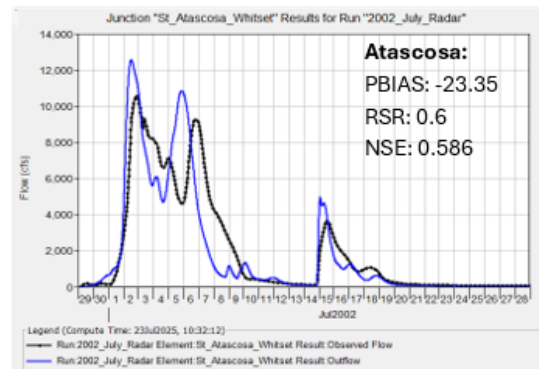

## 2018 Calibration

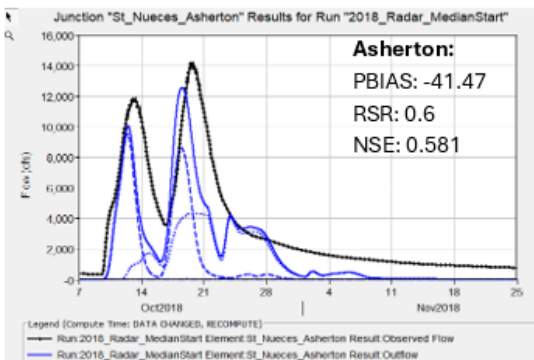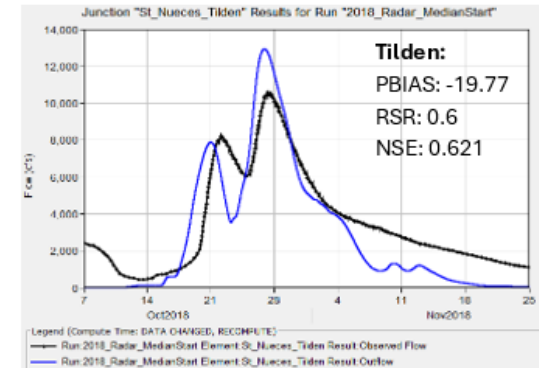

## 2018 Calibration

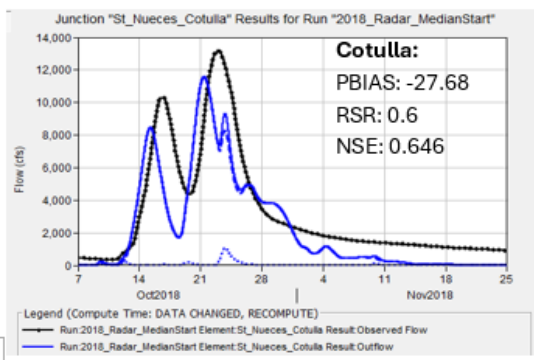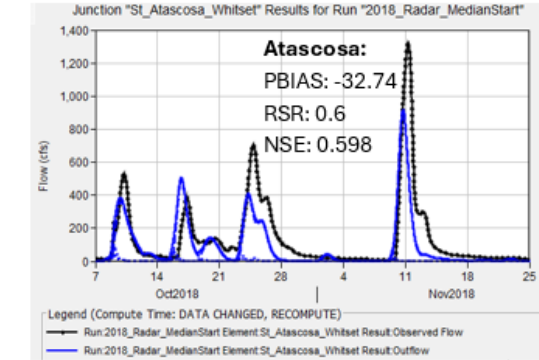

Figure S3b: Flow hydrographs for calibration at Lake Corpus Christi stations (2016 and 2018)

Table S1: Characteristics of and initial condition calibrated and derived ensemble for Choke Canyon Reservoir model

| Choke canyon Reservoir model ensemble members |                 |                                                                                                                                       |
|-----------------------------------------------|-----------------|---------------------------------------------------------------------------------------------------------------------------------------|
| Event Year                                    | Ensemble member | Description                                                                                                                           |
| 1997                                          | 1997-Cali       | This original model has been prepared by calibrating on the 1997 summer event (20-Jun to 6-July).                                     |
|                                               | 1997-Wet        | The wet scenario is developed from the original considering highly saturated initial soil moisture condition with no initial loss.    |
|                                               | 1997-Dry        | The dry scenario represents a probable dry initial condition created with 2 times the observed initial loss from the calibrated model |
| 2002                                          | 2002-Cali       | This original model has been prepared by calibrating on the 2002 summer (29-Jun to 29-July).                                          |
|                                               | 2002-Wet        | The wet scenario is developed from the original considering highly saturated initial soil moisture condition with no initial loss.    |
|                                               | 2002-Dry        | The dry scenario represents a probable dry initial condition created with 2 times the observed initial loss from the calibrated model |
| 2015                                          | 2015-Cali       | This original model has been prepared by calibrating on the 2015 (11-May to 7-Jun).                                                   |
|                                               | 2015-Wet        | The wet scenario is developed from the original considering highly saturated initial soil moisture condition with no initial loss.    |
|                                               | 2015-Dry        | The dry scenario represents a probable dry initial condition created with 2 times the observed initial loss from the calibrated model |
| 2018                                          | 2018-Cali       | This original model has been prepared by calibrating on the 2018 (07-Oct to 30-Oct).                                                  |
|                                               | 2018-Wet        | The wet scenario is developed from the original considering highly saturated initial soil moisture condition with no initial loss.    |
|                                               | 2018-Dry        | The dry scenario represents a probable dry initial condition created with 2 times the observed initial loss from the calibrated model |

Table S2: Characteristics of and initial condition calibrated and derived ensemble for Lake Corpus Christi model

| Lake Corpus Christi inflow model Ensemble members |                 |                                                                                                                                       |
|---------------------------------------------------|-----------------|---------------------------------------------------------------------------------------------------------------------------------------|
| Event Year                                        | Ensemble member | Description                                                                                                                           |
| 2002                                              | 2002-Cali       | This original model has been prepared by calibrating on the 2002 event (29-Jun to 29-July).                                           |
|                                                   | 2002-Wet        | The wet scenario is developed from the original considering highly saturated initial soil moisture condition with no initial loss.    |
|                                                   | 2002-Dry        | The dry scenario represents a probable dry initial condition created with 2 times the observed initial loss from the calibrated model |
| 2015                                              | 2015-Cali       | This original model has been prepared by calibrating on the 2015 summer (07-May to 20-Jun).                                           |
|                                                   | 2015-Wet        | The wet scenario is developed from the original considering highly saturated initial soil moisture condition with no initial loss.    |
|                                                   | 2015-Dry        | The dry scenario represents a probable dry initial condition created with 2 times the observed initial loss from the calibrated model |
| 2016                                              | 2016-Cali       | This scenario has been prepared calibrating on the 2016 summer (24-Sep to 30-Oct).                                                    |
|                                                   | 2016-Wet        | The wet scenario is developed from the original considering highly saturated initial soil moisture condition with no initial loss.    |
|                                                   | 2016-Dry        | The dry scenario represents a probable dry initial condition created with 2 times the observed initial loss from the calibrated model |
| 2018                                              | 2018-Cali       | This scenario has been prepared calibrating on the 2018 summer (07-Oct to 25-Nov).                                                    |
|                                                   | 2018-Wet        | The wet scenario is developed from the original considering highly saturated initial soil moisture condition with no initial loss.    |
|                                                   | 2018-Dry        | The dry scenario represents a probable dry initial condition created with 2 times the observed initial loss from the calibrated model |

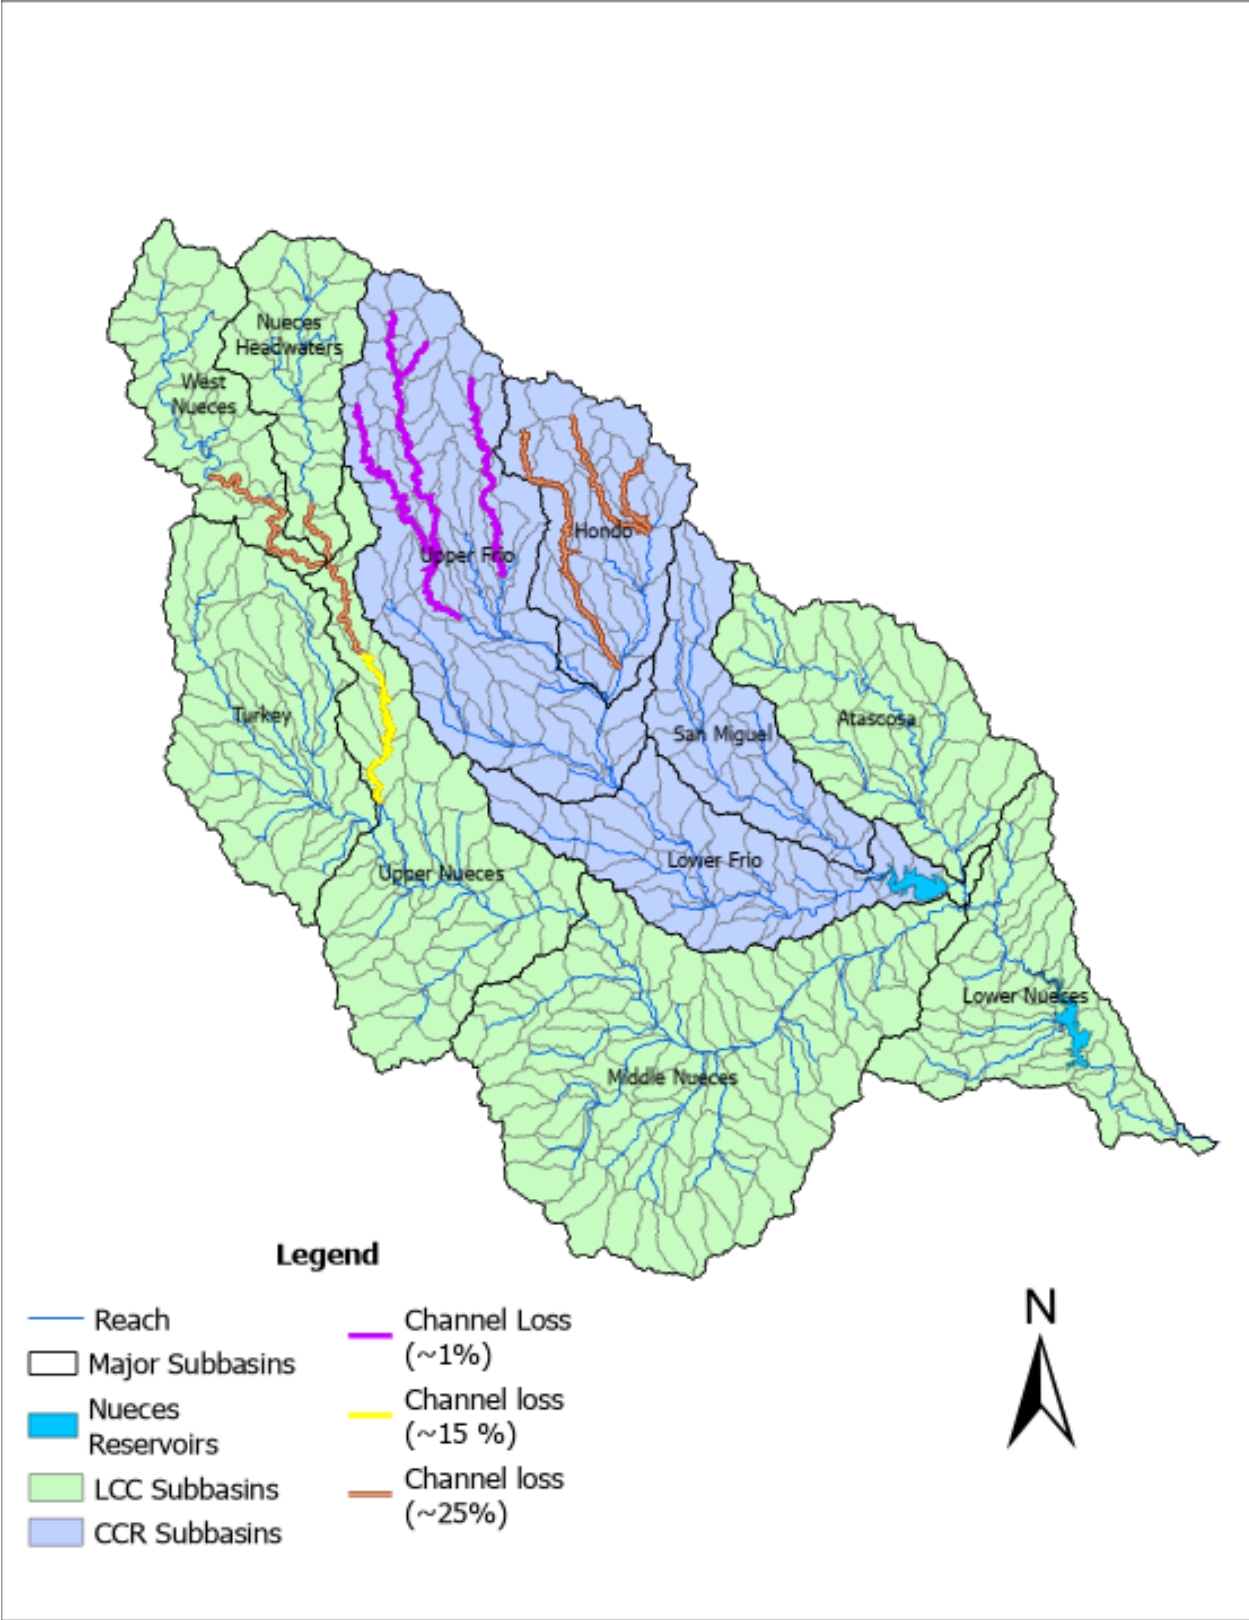

Figure S4a: Nueces River Basin channel loss reaches on HEC-HMS

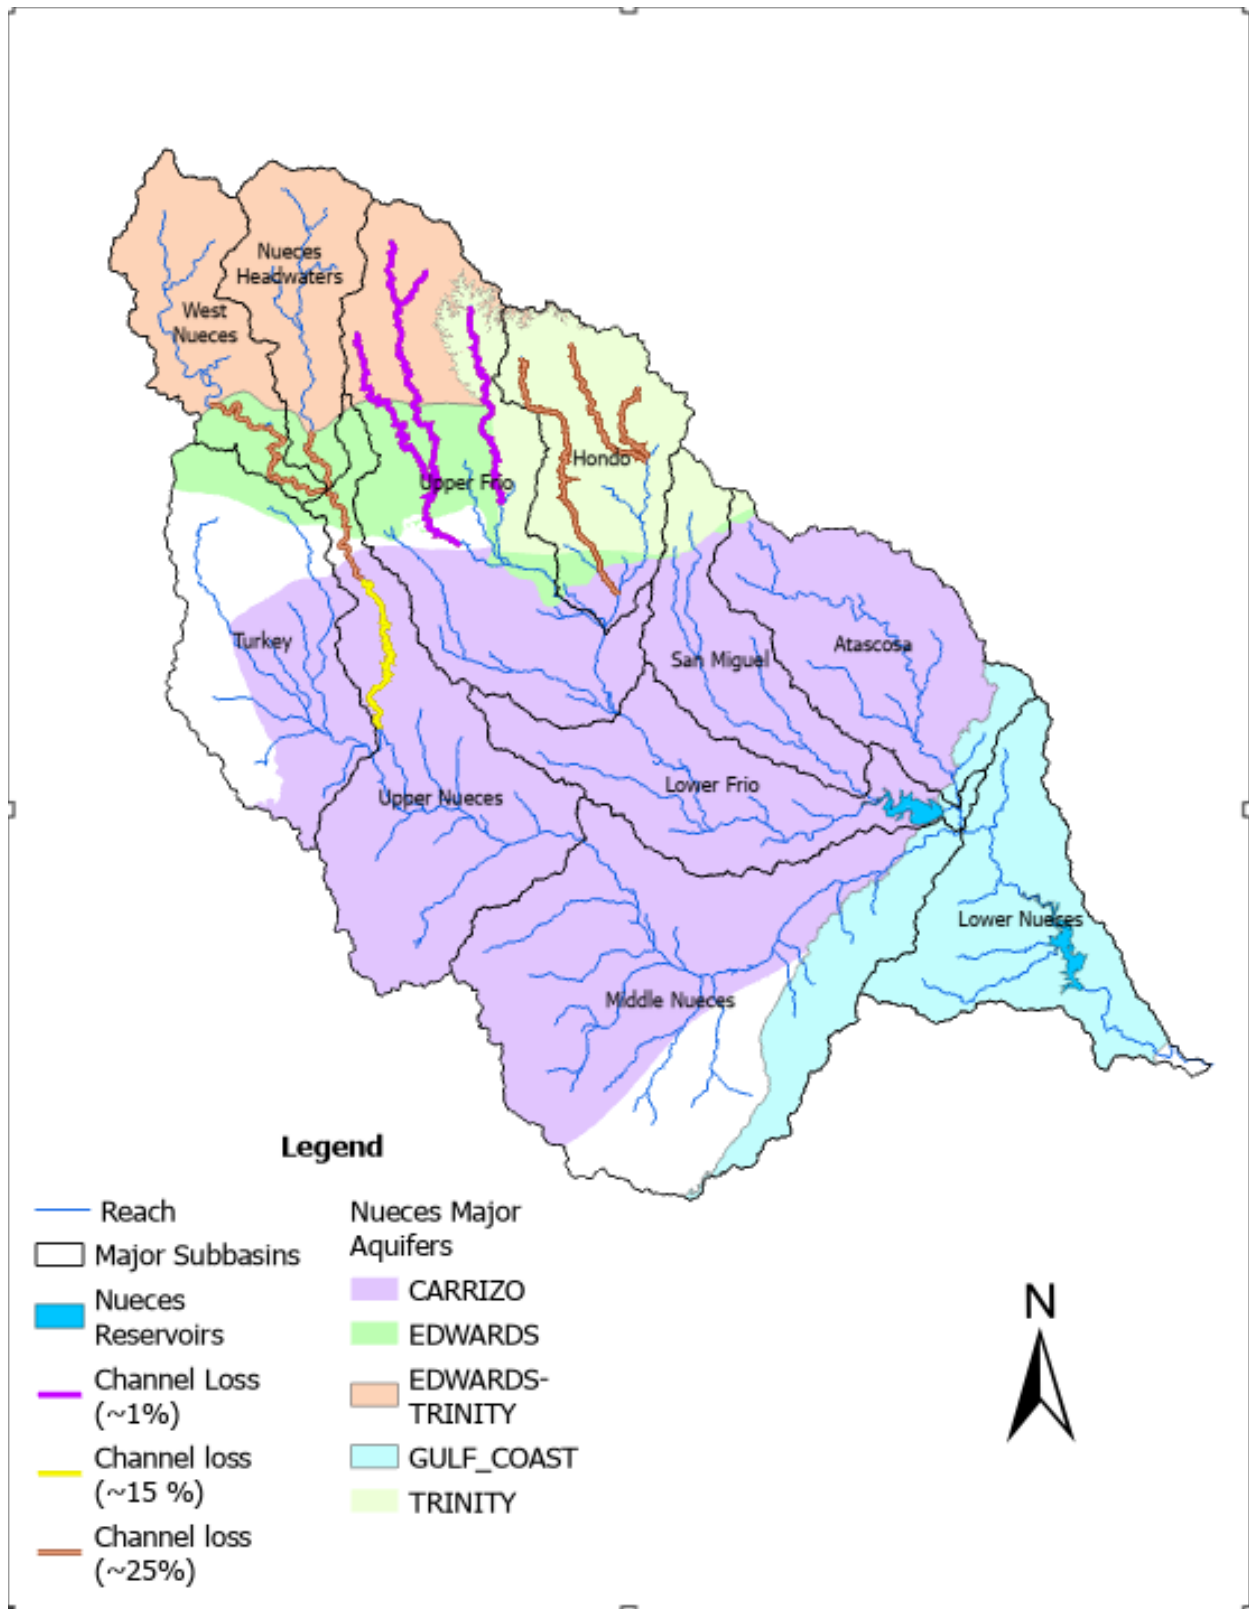

Figure S4b: Nueces Basin River channel loss reaches with ground water aquifer layers
